# Supplementary material for: Single-molecule imaging of Bacteroides fragilis AddAB reveals the highly processive translocation of a single motor helicase
Source: PubMed Central journal article supplement — Nucleic Acids Res. 2010 Feb 25;38(11):3721–31. doi: 10.1093/nar/gkq100 (PMC2887965; doi:10.1093/nar/gkq100), 2010-02-25

# Single molecule imaging of *Bacteroides fragilis* AddAB reveals the highly processive translocation of a single motor helicase.

Marcel Reuter<sup>1</sup>, Frances Parry<sup>2</sup>, David T.F. Dryden<sup>1\*</sup> and Garry W. Blakely<sup>2\*</sup>

<sup>1</sup> EastChem School of Chemistry and COSMIC, The University of Edinburgh, The King's Buildings, Edinburgh, EH9 3JJ, UK. <sup>2</sup> School of Biological Sciences, The University of Edinburgh, The King's Buildings, Edinburgh EH9 3JJ, UK

## Supplementary figures

**Supplementary figure S1** Correlation of AddAB rate with AddAB processivity for 0.01, 0.03, 0.05, 0.1, 0.5, 1, 2 and 5 mM ATP. These data indicate there is a positive linear correlation between AddAB rate and AddAB processivity at ATP concentrations of 0.01, 0.03, 0.1 and 0.5 mM.

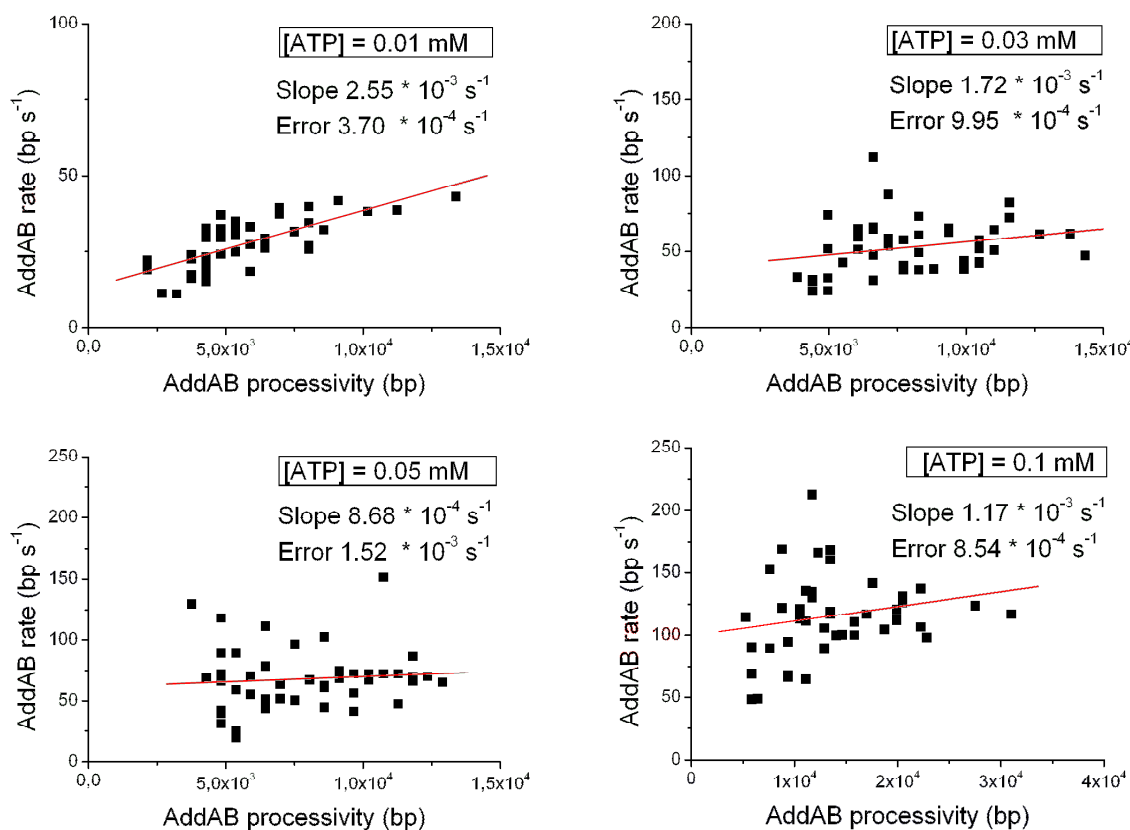

## Supplementary figure S1 continued

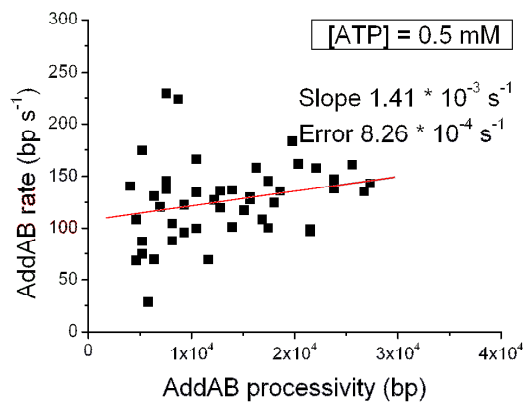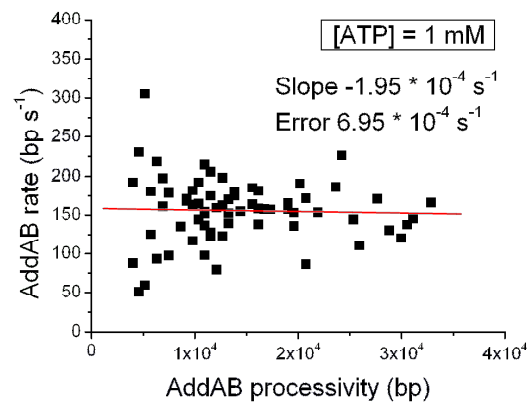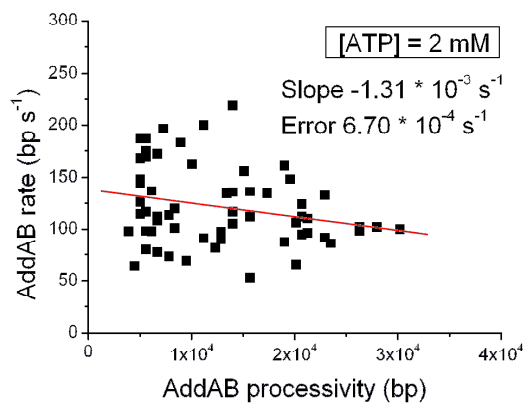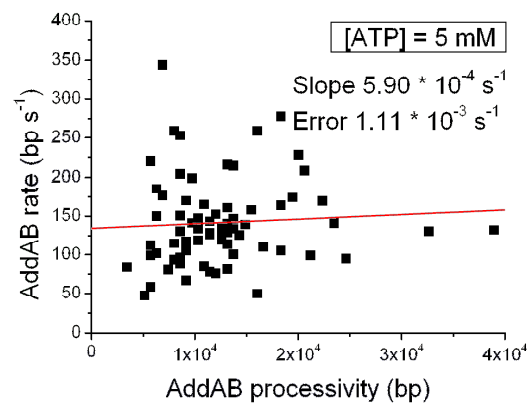

**Supplementary Figure S2:** Shear rate dependence of AddAB processivity and rate. At zero shear rate a hypothetical rate and processivity of  $12,600 \pm 11,260$  bp and  $182 \pm 94$  bp s<sup>-1</sup> are reached.

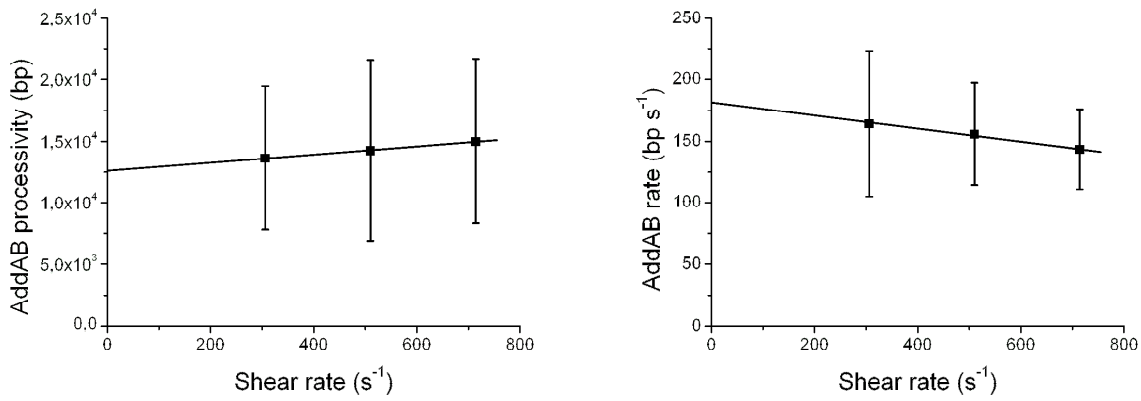

**Supplementary Figure S3:** YOYO-1 staining ratio dependence (given in dye molecules per DNA base pair) of AddAB processivity and rate.

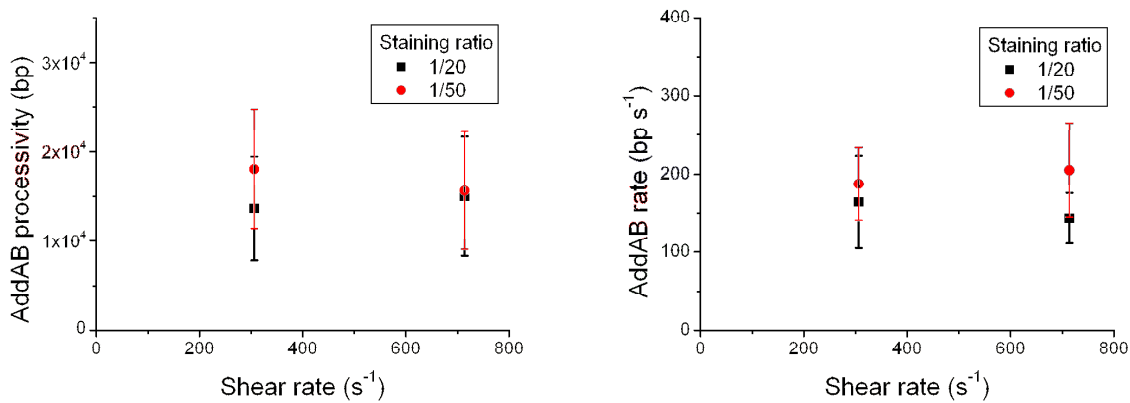

Supplement: gkq100v2_1.pdf [file gkq100v2_1.pdf]
