# Supplementary material for: Single-molecule imaging of Bacteroides fragilis AddAB reveals the highly processive translocation of a single motor helicase
Source: PubMed Central journal article supplement — Nucleic Acids Res. 2010 Feb 25;38(11):3721–31. doi: 10.1093/nar/gkq100 (PMC2887965; doi:10.1093/nar/gkq100), 2010-02-25
Supplement: gkq100v2_2.pdf [file gkq100v2_2.pdf]

## Supplementary Movie Information

**Single molecule imaging of *Bacteroides fragilis* AddAB reveals the highly processive translocation of a single motor helicase.**

**Marcel Reuter<sup>1</sup>, Frances Parry<sup>2</sup>, David T.F. Dryden<sup>1\*</sup> and Garry W. Blakely<sup>2\*</sup>**

<sup>1</sup> EastChem School of Chemistry and COSMIC, The University of Edinburgh, The King's Buildings, Edinburgh, EH9 3JJ, UK. <sup>2</sup>School of Biological Sciences, The University of Edinburgh, The King's Buildings, Edinburgh EH9 3JJ, UK

### Movie 1

This movie shows a single stretched molecule of fluorescently-labelled lambda DNA, attached to a surface by its left hand end, being digested from its right hand end by the processive action of a single molecule of AddAB.

### Movie 2

This movie shows a single stretched molecule of fluorescently-labelled lambda DNA, attached to a surface by its left hand end. At 4 s its right hand end becomes stuck on the surface. At 13 s, the left hand end becomes transiently unstuck and reattaches at a different location on the surface. This results in the formation of a looped structure which becomes two linear fragments upon photodamage at 14 s. A molecule of AddAB then attaches itself to the uppermost linear fragment and digests the DNA.

### Movie 3

This movie shows a single stretched molecule of fluorescently-labelled lambda DNA, attached to a surface by its left hand end. AddAB is present but no ATP has been added and no digestion of the DNA is observed.
